# Supplementary material for: Efficient organic photovoltaic cells on a single layer graphene transparent conductive electrode using MoOxas an interfacial layer
Source: Royal Society of Chemistry journal article supplement (doi:10.1039/c6nr06942h), 2016-11-22
Supplement: c6nr06942h1.pdf [file c6nr06942h1.pdf]

## Electronic Supplementary Information

# Efficient organic photovoltaic cells on a single layer graphene transparent conductive electrode using MoO<sub>x</sub> as an interfacial layer

*J. H. Du,<sup>a†\*</sup> H. Jin,<sup>b†\*</sup> Z. K. Zhang,<sup>a</sup> D. D. Zhang,<sup>a</sup> S. Jia,<sup>a</sup> L. P. Ma,<sup>a</sup> W. C. Ren,<sup>a</sup> H. M. Cheng,<sup>a</sup>*

*P. Burn<sup>b</sup>*

<sup>a</sup> Shenyang National Laboratory for Materials Science, Institute of Metal Research, Chinese Academy of Sciences, 72 Wenhua Road, Shenyang 110016, P. R. China

<sup>b</sup> Centre for Organic Photonics & Electronics, The University of Queensland, Brisbane, QLD 4072, Australia

† These authors contribute equally to this work.

\* Corresponding author. Email address: [jhdu@imr.ac.cn](mailto:jhdu@imr.ac.cn), [h.jin1@uq.edu.au](mailto:h.jin1@uq.edu.au)

KEYWORDS: graphene, molybdenum oxide, transparent electrode, interfacial layer, organic photovoltaic cell

We used optical microscopy (OM), scanning electron microscopy (SEM), high-resolution transmission electron microscopy (HRTEM) and Raman spectroscopy to characterize the single layer graphene (SLG) grown on Cu foil and then transferred onto a SiO<sub>2</sub>/Si substrate and TEM grid, respectively. As shown in Figure S1a-c, the graphene film is mostly single layer with some bilayer or multilayer islands on its surface. Raman spectrum in Figure S1d also shows typical features of single layer graphene dominant: a G band around 1590 cm<sup>-1</sup>, a very strong symmetrical 2D band at 2683 cm<sup>-1</sup>, and a strong 2D to G intensity ratio of ~2. The very small D band indicates the presence of defects and grain boundaries, which are frequently observed in CVD grown graphene.

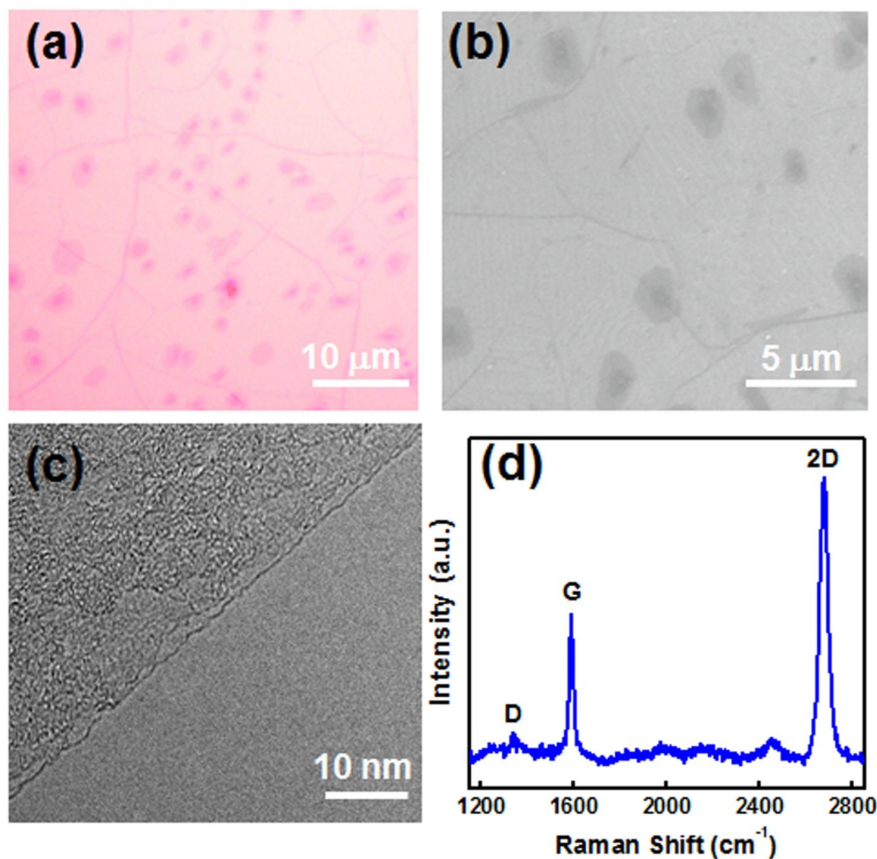

**Figure S1.** (a) OM, (b) SEM and (c) HRTEM images, and (d) Raman spectrum of a SLG.

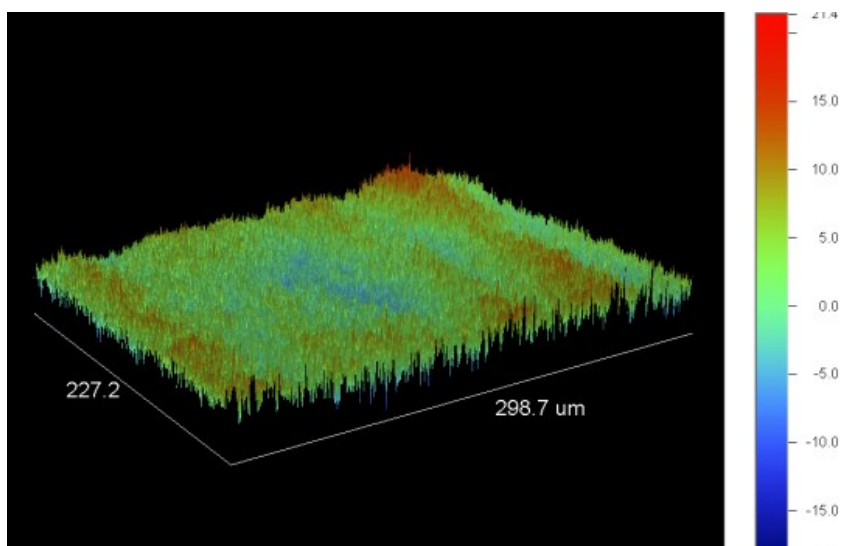

Figure S2. Optical profiler image of an ITO TCE on glass.

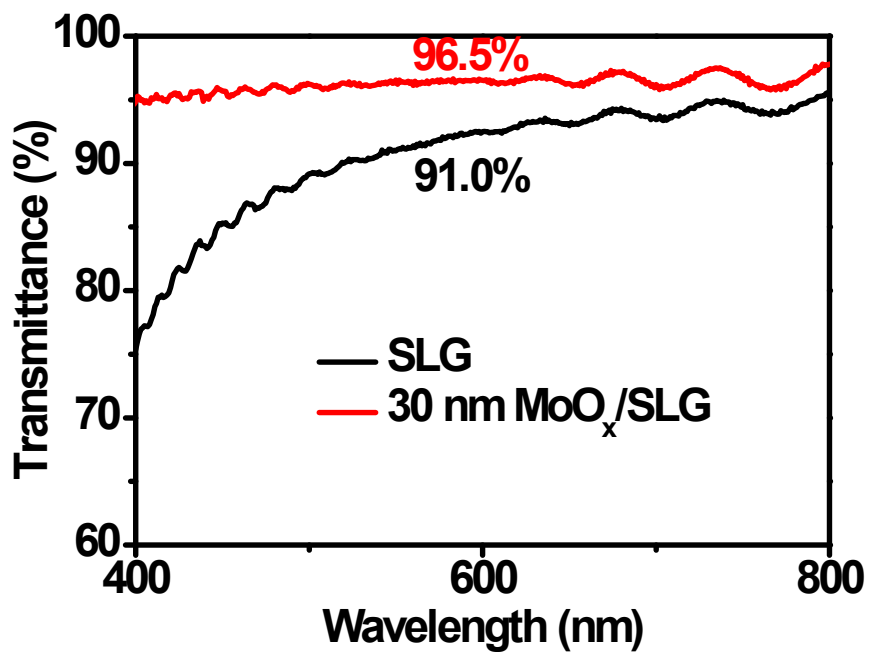

Figure S3. Transmittance of a SLG TCE before and after MoO<sub>x</sub> deposition.

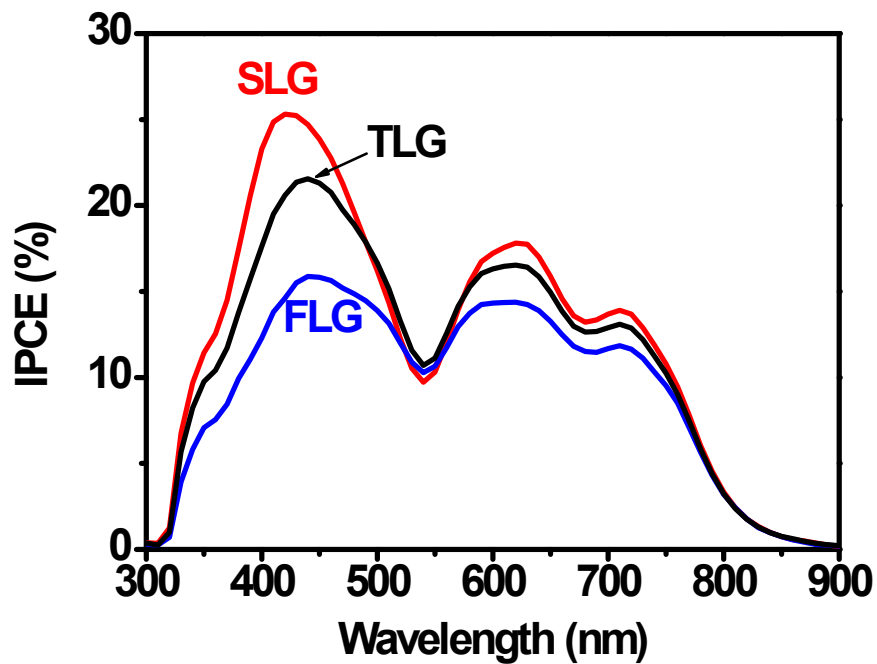

Figure S4. IPCE of OPV cells fabricated on SLG, TLG and FLG anodes.

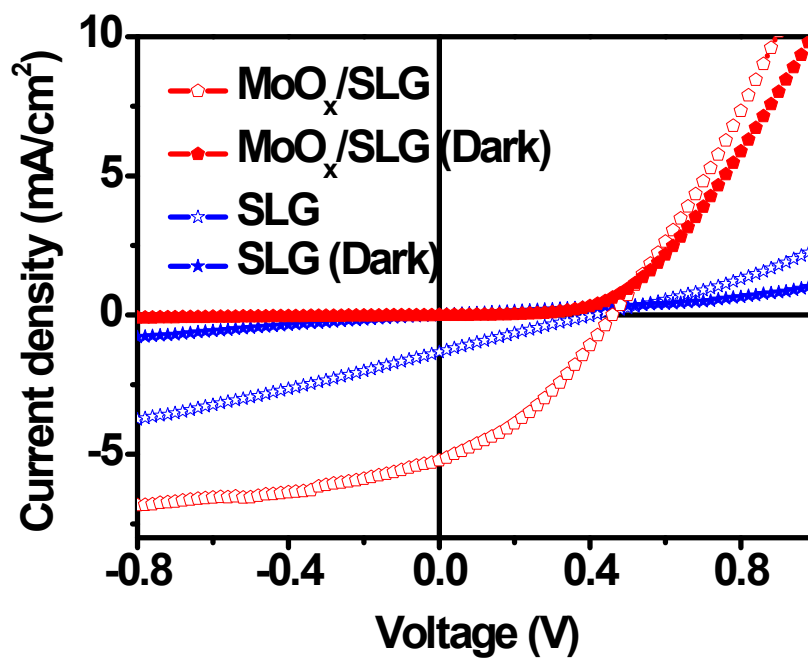

Figure S5.  $J$ - $V$  characteristics of OPV cells fabricated on a SLG anode with and without a  $\text{MoO}_x$  interfacial layer under illumination and in the dark (solid symbols).

**Table S1.** Summary of performance of the devices fabricated on a SLG anode with and without a MoO<sub>x</sub> interfacial layer, including  $V_{OC}$ ,  $J_{SC}$ ,  $FF$ ,  $\eta$ ,  $R_s$  and  $R_{sh}$  under illuminated condition  
(Parameters in Parentheses Are for the Best Cells).

| TCE                   | $V_{OC}$ (V)        | $J_{SC}$ (mA/cm <sup>2</sup> ) | $FF$                | $\eta$ (%)          | $R_s$ ( $\Omega$ .cm <sup>2</sup> ) | $R_{sh}$ ( $\Omega$ .cm <sup>2</sup> ) |
|-----------------------|---------------------|--------------------------------|---------------------|---------------------|-------------------------------------|----------------------------------------|
| MoO <sub>x</sub> /SLG | 0.42±0.02<br>(0.44) | 4.98±0.22<br>(5.20)            | 0.34±0.03<br>(0.37) | 0.78±0.06<br>(0.84) | 319±38<br>(281)                     | 948±33<br>(981)                        |
| SLG                   | 0.38±0.02<br>(0.40) | 1.06±0.27<br>(1.33)            | 0.24±0.01<br>(0.25) | 0.09±0.04<br>(0.13) | 1832±88<br>(1744)                   | 1361±38<br>(1399)                      |
